# Supplementary material for: Early afterdepolarisation tendency as a simulated pro-arrhythmic risk indicator
Source: Toxicol Res (Camb). 2017 Sep 14;6(6):912–21. doi: 10.1039/c7tx00141j (PMC5779076; doi:10.1039/c7tx00141j)
Supplement: Supplementary file 1 [file TX-006-C7TX00141J-s001.xlsx]

## Sheet: Notes
Sheet name	Contents	Relevant paper section	Relevant figures, tables, and equations
References for IC50s	References to papers where each IC50 value was found	Drug inclusion criteria	Table 1
Results	Simulation results for each drug: Grandi APD90, Grandi APD50, Grandi [Ca]i, OHara APD50, OHara [Ca]i, OHara INa inactivation curve shift EAD threshold, OHara ICaL increase EAD threshold, OHara IKr decrease threshold, and Herg block / Cmax. Tested concentration: EFTPC_max	EAD thresholds	Figure 3
Cqinward Results	Simulation results calculating the Cqinward metric from Li et al 2017, for each -fold EFTPC_max of each drug.	Previously suggested measures
Dendrogram ranking errors	The ranking errors between the ideal dendrogram ordering and the actual dendrogram ordering, as described in Equation 2	Linkage analysis	Equation 2, Figure 4
LDA 1	Leave-one-out classifications for each drug using linear discriminant analysis for Grandi APD90, Grandi Lancaster-Sobie, OHara Lancaster-Sobie, OHara EAD metrics, Herg block / Cmax, and combinations of these	Pro-arrhythmic risk classification	Table 2
SVM 1	Leave-one-out classifications for each drug using support vector machines for Grandi APD90, Grandi Lancaster-Sobie, OHara Lancaster-Sobie, OHara EAD metrics, Herg block / Cmax, and combinations of these	Pro-arrhythmic risk classification	Table 2
LDA 5	Five-group classifications for each drug using linear discriminant analysis for Grandi APD90, Grandi Lancaster-Sobie, OHara Lancaster-Sobie, OHara EAD metrics, Herg block / Cmax, and combinations of these	Pro-arrhythmic risk classification	Table 2
SVM 5	Five-group classifications for each drug using support vector machines for Grandi APD90, Grandi Lancaster-Sobie, OHara Lancaster-Sobie, OHara EAD metrics, Herg block / Cmax, and combinations of these	Pro-arrhythmic risk classification	Table 2
LDA 1 errors	Errors from eave-one-out classifications for each drug using linear discriminant analysis for Grandi APD90, Grandi Lancaster-Sobie, OHara Lancaster-Sobie, OHara EAD metrics, Herg block / Cmax, and combinations of these	Pro-arrhythmic risk classification	Table 2
SVM 1 errors	Errors from leave-one-out classifications for each drug using support vector machines for Grandi APD90, Grandi Lancaster-Sobie, OHara Lancaster-Sobie, OHara EAD metrics, Herg block / Cmax, and combinations of these	Pro-arrhythmic risk classification	Table 2
LDA 5 errors	Errors from five-group classifications for each drug using linear discriminant analysis for Grandi APD90, Grandi Lancaster-Sobie, OHara Lancaster-Sobie, OHara EAD metrics, Herg block / Cmax, and combinations of these	Pro-arrhythmic risk classification	Table 2
SVM 5 errors	Errors from five-group classifications for each drug using support vector machines for Grandi APD90, Grandi Lancaster-Sobie, OHara Lancaster-Sobie, OHara EAD metrics, Herg block / Cmax, and combinations of these	Pro-arrhythmic risk classification	Table 2
Cqinward LDA1	Leave-one-out classifications for each drug using linear discriminant analysis for Cqinward metric	Pro-arrhythmic risk classification	Table 2
Cqinward SVM1	Leave-one-out classifications for each drug using support vector machines for Cqinward metric	Pro-arrhythmic risk classification	Table 2
Cqinward LDA5	Five-group classifications for each drug using linear discriminant analysis for Cqinward metric	Pro-arrhythmic risk classification	Table 2
Cqinward SVM5	Five-group classifications for each drug using support vector machines for Cqinward metric	Pro-arrhythmic risk classification	Table 2
Cqinward LDA1 errors	Errors from leave-one-out classifications for each drug using linear discriminant analysis for Cqinward metric	Pro-arrhythmic risk classification	Table 2
Cqinward SVM1 errors	Errors from leave-one-out classifications for each drug using support vector machines for Cqinward metric	Pro-arrhythmic risk classification	Table 2
Cqinward LDA5 errors	Errors from five-group classifications for each drug using linear discriminant analysis for Cqinward metric	Pro-arrhythmic risk classification	Table 2
Cqinward SVM5 errors	Errors from five-group classifications for each drug using support vector machines for Cqinward metric	Pro-arrhythmic risk classification	Table 2
Binary LDA 1	Leave-one-out classifications for each drug using linear discriminant analysis for Grandi APD90, Grandi Lancaster-Sobie, OHara Lancaster-Sobie, OHara EAD metrics, Herg block / Cmax, and combinations of these, using a 2-category risk classification system
Binary SVM 1	Leave-one-out classifications for each drug using support vector machines for Grandi APD90, Grandi Lancaster-Sobie, OHara Lancaster-Sobie, OHara EAD metrics, Herg block / Cmax, and combinations of these, using a 2-category risk classification system
Binary LDA 1 errors	Errors from eave-one-out classifications for each drug using linear discriminant analysis for Grandi APD90, Grandi Lancaster-Sobie, OHara Lancaster-Sobie, OHara EAD metrics, Herg block / Cmax, and combinations of these, using a 2-category risk classification system
Binary SVM 1 errors	Errors from leave-one-out classifications for each drug using support vector machines for Grandi APD90, Grandi Lancaster-Sobie, OHara Lancaster-Sobie, OHara EAD metrics, Herg block / Cmax, and combinations of these, using a 2-category risk classification system
EAD thresholds at faster pacing rates	Thresholds for EAD-provoking protocols using 500, 1000, and 2000-ms pacing rates.
Hypokalemia	Thresholds for EAD-provoking protocols when extracellular potassium concentration is set to 3/4 its original value

## Sheet: Mean errors
	APD90 +ICaL increase	APD90	Grandi Lancaster-Sobie	ICaL increase	APD90 +INa shift +ICaL increase +IKr block	INa shift +ICaL increase +IKr block	Herg block / Cmax	OHara Lancaster-Sobie	INa shift	Cqinward	IKr block
LDA 1	0.780488	0.804878	0.95122	0.780488	0.95122	1	1.17073	0.95122	1.04878	1.19512	0.902439
SVM 1	0.780488	0.707317	0.682927	1.07317	0.97561	1.17073	0.853659	1.07317	1.19512	1.09756	1.29268
LDA 5	0.829268	0.97561	0.926829	0.926829	0.878049	1	1.17073	1.26829	1.07317	1.02439	1
SVM 5	0.902439	0.902439	0.878049	0.853659	0.853659	1	0.97561	1.02439	1	1.04878	1.65854
Sum	3.29268	3.39024	3.43902	3.63415	3.65854	4.17073	4.17073	4.31707	4.31707	4.36585	4.85366

## Sheet: References for IC50s
Name	INa	ICaL	hERG	IKs	IpNa	Ito	IK1	EFTPC_max
ajmaline	Bahnikova et al. 2002	PMID: 16308426	PMID: 15599706			PMID: 23832378		PMID: 21480866
amiodarone	PMID: 23341577	PMID: 7532747	PMID: 21300721	PMID:15817093	PMID: 11343415	PMID: 16626588	PMID: 16626588	PMID: 12667944
amitriptyline	PMID: 21480866	PMID: 18048694	PMID: 10742304	PMID: 27060526	PMID: 27060526	PMID: 10333718		PMID: 12667944
azimilide	PMID:9048249	PMID:11033107	PMID: 12667944	PMID:15817095				PMID: 12667944
bepridil	PMID: 21300721	PMID: 21300721	PMID: 12667944	PMID:9765513	PMID: 27060526	PMID: 11711026		PMID: 12667944
chlorpromazine	PMID: 21480866	PMID: 2571988	PMID: 18448342	PMID: 15071359	PMID: 27060526	PMID: 7965778	PMID: 7965778	PMID: 12667944
cibenzoline	PMID: 7527502	PMID: 2050292	PMID: 19673885	PMID:11050299	PMID: 27060526			PMID: 12667944
cisapride	PMID: 21480866	PMID: 21300721 and PMID: 14975710	PMID: 9374794	DOI: 10.1016/S1520-765X(01)90003-3		DOI: 10.1016/S1520-765X(01)90003-3		PMID: 12667944
clozapine		PMID: 2571988	PMID: 16633353	PMID: 16633353				PMID: 21422906
desipramine	PMID: 21300721	PMID: 21300721	PMID: 11961040					PMID: 12667944
diltiazem	PMID: 21480866	PMID: 8709127	PMID: 15936217			PMID: 15678082		PMID: 12667944
disopyramide			PMID: 12667944	PMID:11050299		PMID:12906757		PMID: 12667944
dl-sotalol		PMID:21224008	PMID: 15385083	PMID:21224008				PMID: 12667944
dofetilide	PMID: 7629795	PMID: 23812503	PMID: 15637086					PMID: 12667944
flecainide	PMID: 20601018	PMID: 27060526	PMID: 19673885	PMID: 8762029	PMID: 24291413	PMID: 12875427		PMID: 12667944
fluvoxamine	PMID: 21300721	PMID: 21300721	PMID: 12839862					PMID: 10379420
halofantrine			PMID: 12176129, poland list	PMID: 15558243		PMID: 15558243		PMID: 17031389
imipramine	PMID: 21480866	PMID: 18048694	PMID: 12667944			PMID: 10333718		PMID: 12667944
loratadine			PMID: 19673885			PMID:10604956	PMID:10604956	PMID: 12667944
methadone	PMID: 20930594	PMID: 20930594	PMID:20467834					PMID: 16289016 and PMID:23812503
mexiletine	PMID: 21480866 & manual PMID: 20601018	PMID: 11743888	PMID: 12007180	PMID: 8762029	PMID: 23580742			PMID: 12667944
mibefradil	PMID: 15790762	PMID: 10769189	PMID: 19673885		PMID: 27060526			PMID: 12667944
nifedipine	PMID: 21480866	PMID: 19004630	PMID: 10924918	PMID: 10924918		Gotoh et al. 1991		PMID: 12667944
nitrendipine	PMID: 23812503	PMID: 23812503	PMID: 19673885			Gotoh et al. 1991		PMID: 12667944
ondansetron	PMID:11046096	PMID: 27060526	PMID:11046096	PMID:11046096	PMID: 27060526			PMID: 16675509
pentamidine		PMID: 23625347	PMID: 16278312				PMID: 20180941	PMID: 17031389
phenytoin	PMID: 21300721	PMID: 21300721	PMID: 15716081					PMID: 12667944
pimozide	PMID: 2426120	PMID: 23812503	PMID: 12667944	PMID: 10762666				PMID: 12667944
prenylamine	PMID: 21300721	PMID: 21300721	PMID: 21300721					PMID: 2373134
propafenone	PMID: 21300721	PMID: 21300721	PMID: 12086981		PMID: 27060526	PMID: 9602427	PMID: 8450455	PMID: 12667944
propranolol	PMID: 21300721	PMID: 21300721	PMID: 16843688					PMID: 1175271
quetiapine	PMID: 21300721	PMID: 21300721	PMID: 12176106					PMID: 12667944
quinidine	PMID: 21480866 & manual PMID: 21300721	PMID: 21300721	PMID: 10028924	PMID: 21224008		PMID: 8330377	PMID: 10716610	PMID: 12667944
ranolazine	PMID: 16686675	PMID: 15302796	PMID: 15302796	PMID: 16686675	PMID: 16686675			PMID: 25054430
risperidone	PMID: 21480866 & manual PMID: 21300721	PMID: 21300721	PMID: 19673885	PMID: 21224008				PMID: 12667944
sertindole	PMID: 12966159	PMID: 12966159	PMID: 12667944	DOI: 10.1016/S1520-765X(01)90003-3		DOI: 10.1016/S1520-765X(01)90003-3		PMID: 12667944
tedisamil	DOI:10.1111/j.1527-3466.1995.tb00212		PMID: 9831899			PMID: 9831899		PMID: 12667944
terfenadine	PMID: 21300721	PMID: 21300721	PMID: 16843688	PMID: 21224008		PMID: 10528990		PMID: 17031389
terodiline		PMID: 10482914	PMID: 12667944	PMID: 10991917			PMID:10334509	PMID: 12667944
thioridazine	PMID: 21300721	PMID: 21300721	PMID: 12667944	PMID:10027867				PMID: 12667944
verapamil	PMID: 21480866 & manual PMID: 21300721	PMID: 21300721	PMID: 21300721	PMID: 21224008		PMID: 18604993		PMID: 12667944

## Sheet: Results
Drug	Redferns	APD90 (ms)	Grandi APD50 (ms)	Grandi Cai (mM)	OHara APD50 (ms)	OHara Cai (mM)	INa shift (mV)	ICaL (factor)	Ikr (factor)	Herg block / Cmax
ajmaline	2	305.561	254.314	8.58e-05	498.986	8.89e-05	0	1	1	0.060808
amiodarone	2	286.891	230.937	8.82e-05	183.474	7.67e-05	17.343	23.5371	0.155823	60
amitriptyline	4	286.477	230.583	8.82e-05	183.096	7.66e-05	17.315	21.5954	0.2146	80
azimilide	2	305.041	244.491	8.91e-05	272.705	8.8e-05	15.5453	8.71754	0.267517	1.42857
bepridil	3	269.302	212.947	8.56e-05	184.385	7.57e-05	17.2983	28.2542	0.121887	18.1818
chlorpromazine	3	285.921	229.804	8.8e-05	184.196	7.65e-05	17.3991	25.9516	0.134521	38.9474
cibenzoline	5	284.627	229.343	8.76e-05	187.185	7.57e-05	17.7438	25.3166	0.143188	23.1557
cisapride	2	306.517	245.701	8.92e-05	275.023	8.81e-05	15.4476	8.23491	0.271484	1.32653
clozapine	4	304.571	244.253	8.91e-05	267.327	8.8e-05	15.639	9.54702	0.253662	1.55958
desipramine	4	281.018	225.057	8.71e-05	216.048	8.55e-05	17.3661	22.2873	0.156067	12.8704
diltiazem	5	180.563	120.504	8.19e-05	160.966	6.67e-05	17.4928	78.9644	0.0174561	60.5738
disopyramide	2	299.65	240.555	8.89e-05	249.811	8.75e-05	16.1108	11.8337	0.218628	2.42588
dl-sotalol	2	288.603	232.282	8.83e-05	214.35	8.63e-05	17.1974	21.9496	0.161255	18.8692
dofetilide	2	299.337	240.321	8.89e-05	248.658	8.75e-05	16.1411	12.0452	0.215637	2.5
flecainide	3	297.029	238.627	8.83e-05	221.701	7.74e-05	15.2134	10.9586	0.221619	2.12483
fluvoxamine	4	281.366	224.964	8.73e-05	213.983	8.56e-05	17.1658	22.4524	0.156189	14.3939
halofantrine	3	287.42	231.397	8.83e-05	210.846	8.62e-05	17.3161	23.2025	0.156616	43.2
imipramine	4	286	230.154	8.8e-05	211.882	8.6e-05	17.3935	23.152	0.155945	32.0755
loratadine	5	286.468	230.686	8.82e-05	208.09	8.61e-05	17.4119	24.1234	0.153015	18444.4
methadone	2	288.034	231.619	8.8e-05	220.494	8.63e-05	17.1677	20.2873	0.166504	9.46746
mexiletine	4	284.389	228.554	8.75e-05	214.258	8.56e-05	17.44	22.0928	0.155823	12.1095
mibefradil	4	276.213	220.457	8.67e-05	181.014	7.59e-05	16.9751	27.809	0.134216	150
nifedipine	4	270.196	214.336	8.59e-05	202.065	8.41e-05	17.4283	27.4276	0.136963	35714.3
nitrendipine	5	270.942	215.093	8.6e-05	202.463	8.42e-05	17.426	27.2255	0.137878	3311.26
ondansetron	2	304.356	242.479	8.85e-05	262.229	8.09e-05	8.25319	5.86808	0.327759	0.90012
pentamidine	3	288.677	231.126	8.83e-05	208.112	8.61e-05	17.2831	24.1217	0.154297	20500
phenytoin	5	280.815	225.418	8.7e-05	216.403	8.53e-05	17.6376	22.6862	0.154114	14.2857
pimozide	3	287.443	231.439	8.82e-05	211.622	8.62e-05	17.3235	23.0042	0.157166	34.8837
prenylamine	2	293.361	235.359	8.84e-05	235.805	8.7e-05	16.5292	15.5918	0.191528	3.82353
propafenone	4	286.089	226.852	8.65e-05	228.136	7.67e-05	16.3479	9.44046	0.213745	1.82573
propranolol	5	286.752	230.983	8.82e-05	209.378	8.61e-05	17.4197	23.8308	0.154175	108.769
quetiapine	5	286.258	230.437	8.82e-05	208.651	8.6e-05	17.3958	24.0295	0.153442	174.697
quinidine	2	302.627	236.767	8.64e-05	493.419	7.68e-05	0	1	1	0.0926784
ranolazine	4	294.395	236.306	8.85e-05	230.731	8.67e-05	16.5067	15.574	0.186157	3.59375
risperidone	5	286.589	230.777	8.82e-05	208.448	8.61e-05	17.3994	24.0603	0.153442	331.492
sertindole	2	290.831	233.948	8.84e-05	221.196	8.66e-05	16.9756	19.6266	0.170837	8.80503
tedisamil	2	287.903	231.811	8.83e-05	212.221	8.62e-05	17.2881	22.7387	0.158386	29.4118
terfenadine	2	305.962	244.346	8.88e-05	289.854	8.8e-05	15.1138	6.58048	0.30603	0.988889
terodiline	2	324.885	259.496	9.01e-05	360.858	8.81e-05	13.7461	1.81126	0.623901	0.333333
thioridazine	3	264.994	202.505	8.23e-05	542.087	8.36e-05	0	1	1	0.0337079
verapamil	5	242.617	181.114	8.18e-05	233.627	7.69e-05	15.8472	17.9764	0.125305	1.76543
control		286.466	230.688	8.82e-05	208.083	8.61e-05	17.4121	24.1268	0.153015

## Sheet: Cqinward Results
Concentration	0 (control)	1	2	3	4	5	6	7	8	9	10	11	12	13	14	15	16	17	18	19	20	21	22	23	24	25
ajmaline	1	1.0052	1.0095	1.0136	1.017	1.0202	1.023	1.0258	1.0283	1.0308	1.0331	1.0354	1.0376	1.0397	1.042	1.0441	1.046	1.0483	1.0505	1.0525	1.0547	1.0568	1.0589	1.0611	1.0633	1.0655
amiodarone	1	1.00103	1.00207	1.00305	1.00405	1.00488	1.00572	1.00646	1.0072	1.008	1.00865	1.00927	1.00997	1.0105	1.01094	1.01151	1.01204	1.01253	1.01292	1.01342	1.01384	1.01414	1.01434	1.0149	1.01527	1.01542
amitriptyline	1	0.997948	0.995899	0.993825	0.991766	0.989706	0.987729	0.985652	0.983642	0.981616	0.979698	0.977669	0.975646	0.973738	0.9716	0.969869	0.9679	0.966048	0.964182	0.96227	0.960295	0.958584	0.956798	0.954957	0.953108	0.951417
azimilide	1	1.0313	1.0502	1.066	1.081	1.0961	1.1125	1.1302	1.15	1.1726	1.2006	1.2393	1.3117	1.2487	2.1785	1.9988	2.093	4.1039	0.31448	3.8468	0.3337	3.7589	0.35166	3.6938	0.37989	3.6416
bepridil	1	0.946395	0.9033	0.867337	0.836635	0.810568	0.787385	0.766741	0.748487	0.731982	0.716741	0.70296	0.690081	0.678215	0.667139	0.656804	0.647168	0.638006	0.629255	0.62117	0.613273	0.605915	0.598712	0.591907	0.585413	0.579203
chlorpromazine	1	0.997672	0.995198	0.992905	0.990518	0.988047	0.9856	0.983177	0.980757	0.978346	0.975919	0.973504	0.971006	0.968717	0.966376	0.964006	0.96161	0.95927	0.956896	0.954623	0.952331	0.95005	0.94766	0.945508	0.943206	0.941064
cibenzoline	1	1.00598	1.01061	1.01407	1.01684	1.01884	1.02002	1.02074	1.02091	1.02076	1.0202	1.01897	1.01773	1.01624	1.01434	1.0123	1.01004	1.00763	1.00515	1.00252	0.99973	0.996946	0.994046	0.991059	0.987919	0.984868
cisapride	1	1.0314	1.0503	1.0659	1.0805	1.0952	1.1101	1.1259	1.1428	1.1611	1.1819	1.2065	1.2386	1.2887	1.4324	1.3288	2.0801	1.9944	1.9784	2.0284	2.7507	1.9607	3.8833	0.36461	4.0152	0.33481
clozapine	1	1.0395	1.0628	1.0833	1.1038	1.1254	1.1492	1.1762	1.21	1.2601	1.3988	2.0968	2.015	1.978	2.0722	2.6699	0.89423	4.0552	0.3357	3.965	0.33107	3.9146	0.33493	3.8795	0.34089	3.8524
desipramine	1	0.99856	0.99717	0.99582	0.9946	0.99324	0.99204	0.9908	0.98962	0.98858	0.9874	0.98638	0.98537	0.98432	0.98342	0.98236	0.98143	0.98041	0.97968	0.97872	0.97783	0.97703	0.97613	0.97531	0.97443	0.97362
diltiazem	1	0.74827	0.61947	0.54309	0.49456	0.46159	0.43785	0.41992	0.406	0.39493	0.38577	0.37819	0.3718	0.36629	0.36157	0.35758	0.35402	0.35088	0.3482	0.34577	0.3436	0.34167	0.34007	0.33844	0.33722	0.33607
disopyramide	1	1.0122	1.0217	1.0292	1.0353	1.0409	1.0459	1.0507	1.0553	1.0598	1.0644	1.0688	1.0733	1.0779	1.0825	1.0871	1.092	1.0967	1.1018	1.1069	1.1123	1.1177	1.1234	1.1292	1.1355	1.142
dl-sotalol	1	1.0006	1.0015	1.0021	1.0027	1.0036	1.0043	1.0047	1.0057	1.0064	1.0071	1.0077	1.0081	1.0088	1.0096	1.0102	1.0107	1.0113	1.0119	1.0124	1.013	1.0137	1.0142	1.0147	1.0152	1.0158
dofetilide	1	1.0083	1.0153	1.0214	1.0266	1.0314	1.0357	1.0396	1.0434	1.0469	1.0504	1.0536	1.0568	1.0598	1.0628	1.0659	1.0688	1.0719	1.0748	1.0777	1.0806	1.0835	1.0864	1.0893	1.0923	1.0953
flecainide	1	0.987582	0.972301	0.960622	0.952745	0.947729	0.945143	0.944182	0.944582	0.945789	0.947869	0.95053	0.953697	0.957321	0.961261	0.965632	0.970342	0.975435	0.980922	0.986884	0.993004	0.999807	1.00704	1.01486	1.02335	1.03244
fluvoxamine	1	0.99955	0.99905	0.99853	0.9981	0.99741	0.9972	0.99657	0.9962	0.99581	0.99504	0.99475	0.99434	0.99387	0.9935	0.99294	0.9925	0.99202	0.99166	0.9912	0.99063	0.99023	0.98988	0.98936	0.98905	0.9885
halofantrine	1	1.001	1.0021	1.003	1.004	1.005	1.006	1.0069	1.0076	1.0086	1.0094	1.0101	1.0112	1.0119	1.0127	1.0136	1.0143	1.0151	1.0159	1.0165	1.0173	1.018	1.0187	1.0192	1.0201	1.0207
imipramine	1	1.0008	1.0017	1.0024	1.0032	1.004	1.0045	1.0051	1.0061	1.0068	1.0073	1.0079	1.0086	1.0092	1.0096	1.0103	1.0108	1.0114	1.0118	1.0125	1.0127	1.0135	1.0139	1.0142	1.0148	1.0153
loratadine	1	1	1	0.99986	0.99994	0.99994	0.9999	1	0.99999	0.99994	0.99999	0.99995	0.99999	0.99997	0.9999	0.99988	0.99987	0.99999	0.99991	1.0001	0.99999	0.99999	1	0.99991	0.99996	1
methadone	1	1.0002	1.0004	1.0004	1.0009	1.001	1.0013	1.0015	1.0018	1.002	1.0022	1.0023	1.0027	1.0028	1.003	1.003	1.0034	1.0036	1.0038	1.0041	1.0041	1.0045	1.0048	1.0049	1.0049	1.0052
mexiletine	1	0.98435	0.97105	0.95912	0.94915	0.93982	0.93161	0.92418	0.91738	0.91121	0.9055	0.90016	0.89528	0.89074	0.8864	0.88238	0.87852	0.87487	0.87138	0.8683	0.86518	0.8619	0.85922	0.8566	0.85396	0.85142
mibefradil	1	0.972316	0.947256	0.924527	0.903695	0.884462	0.866634	0.850093	0.834718	0.820123	0.806402	0.793726	0.781793	0.770487	0.759556	0.749588	0.739881	0.730938	0.7223	0.714158	0.706508	0.698907	0.692004	0.685402	0.67894	0.67284
nifedipine	1	0.9798	0.9609	0.94314	0.92642	0.91056	0.89533	0.88088	0.86703	0.85384	0.84126	0.82908	0.81739	0.80605	0.79526	0.78463	0.77442	0.76471	0.75514	0.7459	0.73706	0.7284	0.72011	0.71193	0.70413	0.69627
nitrendipine	1	0.99827	0.99643	0.99472	0.99307	0.99123	0.98959	0.98777	0.98609	0.98456	0.98276	0.98093	0.97929	0.97774	0.97613	0.97453	0.97288	0.97125	0.9694	0.968	0.96643	0.96485	0.9631	0.96173	0.96014	0.95852
ondansetron	1	1.03892	1.05485	1.07053	1.08941	1.11594	1.16408	2.0204	1.2087	1.2125	1.80072	1.7887	3.2505	0.825085	3.4063	0.291505	3.30865	0.289917	3.23248	0.289144	3.16734	0.287894	3.10939	0.285941	3.0568	0.283134
pentamidine	1	0.99981	0.99959	0.99946	0.99935	0.99926	0.99922	0.99897	0.99887	0.99869	0.99876	0.99861	0.99849	0.99849	0.9982	0.99826	0.99824	0.99817	0.99808	0.9979	0.99798	0.99794	0.99786	0.99775	0.99765	0.99751
phenytoin	1	1.0012	1.002	1.0028	1.0032	1.0034	1.0035	1.0035	1.0033	1.0031	1.0028	1.0024	1.0018	1.0013	1.0006	0.99981	0.99922	0.99822	0.99753	0.99666	0.99573	0.99482	0.99382	0.99278	0.99185	0.99086
pimozide	1	1.0007	1.0016	1.0023	1.003	1.0038	1.0045	1.0053	1.0059	1.0067	1.0073	1.0081	1.0088	1.0092	1.0101	1.0108	1.0113	1.0121	1.0128	1.0132	1.0138	1.0145	1.0152	1.0159	1.0164	1.017
prenylamine	1	1.0113	1.0196	1.0258	1.0313	1.0358	1.0398	1.0435	1.0469	1.0502	1.0534	1.0565	1.0596	1.0626	1.0656	1.0685	1.0715	1.0745	1.0773	1.0803	1.0833	1.0862	1.0891	1.0922	1.0951	1.098
propafenone	1	1.00271	0.993158	0.981803	0.970112	0.958667	0.94744	0.936354	0.925678	0.915011	0.904643	0.894515	0.884551	0.874849	0.86529	0.856053	0.846846	0.837859	0.829116	0.820619	0.812099	0.804149	0.796184	0.788354	0.780797	0.77331
propranolol	1	1.0011	1.0024	1.0032	1.0041	1.0053	1.0063	1.0074	1.0084	1.0095	1.0104	1.0114	1.0124	1.0134	1.0143	1.0153	1.0163	1.0173	1.0182	1.0192	1.0201	1.021	1.022	1.0228	1.0238	1.0246
quetiapine	1	0.9999	0.99976	0.99964	0.99949	0.99943	0.99933	0.99941	0.99926	0.9991	0.99901	0.99893	0.99883	0.99874	0.99854	0.99845	0.99837	0.99841	0.9982	0.99816	0.99794	0.99782	0.99786	0.99771	0.99752	0.99747
quinidine	1	3.53737	2.38237	1.92447	1.69733	1.54978	1.44252	1.35938	1.29223	1.23646	1.18906	1.14813	1.11225	1.08046	1.05193	1.02615	1.00267	0.981455	0.962146	0.94464	0.928663	0.914171	0.900891	0.888988	0.878786	0.870872
ranolazine	1	0.96232	0.93742	0.91968	0.90622	0.89572	0.88762	0.88103	0.87563	0.87121	0.86776	0.86498	0.86263	0.86086	0.85945	0.85851	0.85773	0.85736	0.85728	0.85726	0.85755	0.85801	0.85864	0.85941	0.86037	0.86151
risperidone	1	0.99992	1	1.0002	1.0005	1.0005	1.0006	1.0008	1.0009	1.001	1.0011	1.0012	1.0013	1.0015	1.0016	1.0016	1.0017	1.0016	1.002	1.002	1.0022	1.0023	1.0024	1.0023	1.0025	1.0027
sertindole	1	1.0002	1.0002	1.0005	1.0007	1.0008	1.001	1.0011	1.0012	1.0015	1.0016	1.0017	1.0019	1.002	1.0022	1.0024	1.0026	1.0027	1.0029	1.0029	1.0032	1.0033	1.0035	1.0035	1.0037	1.0039
tedisamil	1	1.0023	1.0043	1.0063	1.0081	1.0098	1.0114	1.0131	1.0144	1.016	1.0174	1.0186	1.0201	1.0213	1.0225	1.0238	1.0249	1.026	1.0273	1.0284	1.0295	1.0306	1.0317	1.0328	1.0339	1.0351
terfenadine	1	1.0093	1.0171	1.0234	1.0288	1.0337	1.0378	1.0416	1.0452	1.0487	1.0519	1.0552	1.0583	1.0614	1.0643	1.0673	1.0703	1.0732	1.0763	1.0791	1.082	1.085	1.0882	1.0911	1.0941	1.0971
terodiline	1	1.0952	1.1814	2.1075	2.79	3.9993	0.33376	3.846	0.35888	3.7838	0.4018	3.7558	0.29057	3.5668	3.6099	0.33912	3.3152	3.6302	0.3797	3.2279	3.342	0.37014	3.5588	3.1246	3.2556	0.40099
thioridazine	1	1.3091	3.6744	0.29962	3.3334	0.29558	3.1499	0.28398	3.0114	0.27144	2.8966	0.26183	2.7948	0.25661	2.6997	0.25051	2.6142	0.23541	2.536	0.26115	2.3558	0.99121	1.1885	1.1524	1.1249	1.1031
verapamil	1	0.93544	0.89216	0.86065	0.8361	0.81626	0.80006	0.78604	0.77386	0.76316	0.75354	0.74491	0.73698	0.72987	0.72323	0.71705	0.71132	0.70586	0.70093	0.69616	0.69166	0.68739	0.68332	0.67942	0.67575	0.67221

## Sheet: Dendrogram ranking errors
Intervention	Distance metric
APD90 & EADs	32
APD90	46
ICaL EADs	46
IKr EADs	52
APD90 & ICaL	54
hERG/Cmax	54
Grandi LS	56
INa EADs	80
OHara LS	88
EADs	102

## Sheet: LDA 1
Drug name	Grandi Lancaster-Sobie	OHara Lancaster-Sobie	APD90	INa shift	ICaL increase	IKr block	Herg block / Cmax	INa shift +ICaL increase +IKr block	APD90 +INa shift +ICaL increase +IKr block	APD90 +ICaL increase
ajmaline	3	2	2	2	2	2	2	3	2	2
amiodarone	4	5	4	5	4	4	2	4	4	4
amitriptyline	4	5	4	5	4	4	2	4	4	4
azimilide	2	2	2	3	2	3	2	2	2	2
bepridil	5	5	5	5	5	5	2	5	5	5
chlorpromazine	4	5	4	5	5	5	2	5	4	4
cibenzoline	4	5	4	5	5	5	2	4	4	4
cisapride	2	2	2	3	2	3	2	2	2	2
clozapine	2	2	2	3	2	3	2	2	2	2
desipramine	3	4	3	5	4	4	2	4	4	4
diltiazem	5	3	5	5	5	5	2	5	5	5
disopyramide	2	2	2	4	2	4	2	2	4	2
dl-sotalol	4	4	4	5	4	4	2	4	4	4
dofetilide	2	2	2	4	2	4	2	2	4	2
flecainide	2	5	2	3	2	4	2	2	2	2
fluvoxamine	4	4	3	5	4	4	2	4	4	4
halofantrine	4	4	4	5	4	4	2	4	4	4
imipramine	4	4	4	5	4	4	2	4	4	4
loratadine	4	4	4	5	4	5	4	4	4	4
methadone	4	4	4	5	4	4	2	4	4	4
mexiletine	4	4	4	5	4	4	2	4	4	4
mibefradil	3	5	3	4	5	5	2	5	5	5
nifedipine	3	4	5	5	5	5	3	5	5	5
nitrendipine	3	4	5	5	5	5	4	5	5	5
ondansetron	2	3	2	2	2	2	2	3	3	2
pentamidine	4	4	4	5	4	5	4	4	4	4
phenytoin	3	4	3	5	4	4	2	4	4	4
pimozide	4	4	4	5	4	4	2	4	4	4
prenylamine	2	2	2	4	2	4	2	4	4	2
propafenone	3	3	4	4	2	4	2	2	4	3
propranolol	4	4	4	5	4	4	2	4	4	4
quetiapine	4	4	4	5	4	4	2	4	4	4
quinidine	3	3	2	2	2	2	2	3	2	2
ranolazine	2	2	2	4	2	4	2	4	4	2
risperidone	4	4	4	5	4	4	2	4	4	4
sertindole	4	4	4	4	3	4	2	4	4	4
tedisamil	4	4	4	5	4	4	2	4	4	4
terfenadine	2	2	2	3	2	3	2	2	2	2
terodiline	2	2	2	2	2	2	2	4	4	2
thioridazine	5	2	5	2	2	2	2	2	2	4
verapamil	3	3	5	4	3	5	2	3	4	3

## Sheet: SVM 1
Drug name	Grandi Lancaster-Sobie	OHara Lancaster-Sobie	APD90	INa shift	ICaL increase	IKr block	Herg block / Cmax	INa shift +ICaL increase +IKr block	APD90 +INa shift +ICaL increase +IKr block	APD90 +ICaL increase
ajmaline	2	2	2	2	2	2	2	3	2	2
amiodarone	4	5	4	5	5	2	4	5	5	5
amitriptyline	4	5	4	5	4	2	5	4	2	2
azimilide	2	2	2	2	2	2	2	2	2	2
bepridil	4	5	4	5	5	2	2	5	5	5
chlorpromazine	4	5	4	5	5	2	2	5	5	5
cibenzoline	4	5	4	4	4	2	2	4	3	4
cisapride	2	2	2	2	2	2	2	2	2	2
clozapine	2	2	2	2	2	2	2	2	2	2
desipramine	4	5	4	5	5	2	2	5	5	5
diltiazem	5	4	5	4	5	2	5	5	5	5
disopyramide	2	2	2	2	2	2	2	2	2	2
dl-sotalol	4	4	4	5	4	2	2	4	2	2
dofetilide	2	2	2	2	2	2	2	2	2	2
flecainide	2	4	2	2	2	2	2	2	4	2
fluvoxamine	4	5	4	5	5	2	2	5	5	5
halofantrine	4	4	4	5	5	2	4	5	2	2
imipramine	4	5	4	5	5	2	4	5	5	5
loratadine	4	4	4	4	4	2	5	4	3	4
methadone	4	4	4	4	4	2	2	4	4	2
mexiletine	4	5	4	5	5	2	2	5	5	5
mibefradil	4	5	4	4	5	2	4	5	5	5
nifedipine	5	5	5	5	5	2	5	5	5	5
nitrendipine	4	4	4	4	4	2	4	4	4	4
ondansetron	2	2	2	2	2	2	2	2	2	2
pentamidine	4	4	4	5	5	2	5	5	2	2
phenytoin	4	4	4	4	4	2	2	4	4	4
pimozide	4	4	4	5	5	2	2	5	2	2
prenylamine	2	4	2	4	4	2	2	4	4	2
propafenone	4	2	4	2	2	2	2	2	4	4
propranolol	4	4	4	4	4	2	5	4	3	4
quetiapine	4	4	4	4	4	2	5	4	3	4
quinidine	2	2	2	2	2	2	2	3	2	2
ranolazine	2	2	2	2	2	2	2	2	2	2
risperidone	4	4	4	4	4	2	5	4	3	4
sertindole	2	4	4	4	4	2	2	4	2	2
tedisamil	4	4	4	5	4	2	4	4	2	2
terfenadine	2	2	2	2	2	2	2	2	2	2
terodiline	2	2	2	2	2	2	2	2	2	2
thioridazine	5	2	4	2	2	2	2	2	4	4
verapamil	4	2	4	2	4	2	2	2	4	3

## Sheet: LDA 5
Drug name	Grandi Lancaster-Sobie	OHara Lancaster-Sobie	APD90	INa shift	ICaL increase	IKr block	Herg block / Cmax	INa shift +ICaL increase +IKr block	APD90 +INa shift +ICaL increase +IKr block	APD90 +ICaL increase
ajmaline	3	3	2	3	2	3	2	3	3	2
amiodarone	4	5	3	5	4	4	2	4	4	4
amitriptyline	4	5	3	5	4	4	2	4	4	4
azimilide	2	2	2	4	2	3	2	4	2	2
bepridil	3	3	5	5	5	5	2	5	5	5
chlorpromazine	3	5	4	5	3	5	3	3	3	3
cibenzoline	4	5	3	5	4	4	2	4	4	4
cisapride	2	2	2	2	2	3	2	2	2	2
clozapine	2	2	2	3	2	3	2	2	2	2
desipramine	4	4	3	5	3	3	2	4	4	4
diltiazem	5	3	5	5	5	5	2	5	5	5
disopyramide	2	2	2	3	2	4	2	4	4	2
dl-sotalol	4	4	4	5	4	4	2	4	4	4
dofetilide	2	2	2	4	2	4	2	2	2	2
flecainide	2	5	2	2	2	2	2	2	2	2
fluvoxamine	4	2	3	5	3	4	2	4	4	3
halofantrine	4	4	4	5	4	4	4	4	4	4
imipramine	4	4	3	5	4	4	2	4	4	4
loratadine	2	2	4	5	3	5	4	4	4	4
methadone	4	5	4	4	4	4	2	4	4	4
mexiletine	4	2	4	5	3	4	2	4	4	4
mibefradil	3	3	5	4	5	5	2	5	5	5
nifedipine	3	4	5	5	5	5	3	5	5	5
nitrendipine	5	4	5	5	5	5	5	5	5	5
ondansetron	2	3	2	2	2	3	2	3	3	2
pentamidine	3	4	4	5	3	3	4	3	3	3
phenytoin	4	4	3	5	3	3	2	4	4	4
pimozide	5	5	4	5	5	5	2	5	5	5
prenylamine	4	4	4	4	3	4	2	4	4	4
propafenone	3	5	3	4	2	4	2	2	4	3
propranolol	4	4	3	5	4	4	2	4	4	4
quetiapine	2	2	4	5	3	5	2	4	4	4
quinidine	3	3	2	3	2	3	2	3	3	2
ranolazine	2	5	2	4	3	4	2	2	2	2
risperidone	4	4	3	5	4	4	2	4	4	4
sertindole	4	5	4	4	4	4	2	4	4	4
tedisamil	4	4	4	5	4	4	4	4	4	4
terfenadine	2	2	2	2	2	3	2	2	2	2
terodiline	2	2	2	3	2	2	2	2	2	2
thioridazine	5	2	5	2	2	2	2	2	2	4
verapamil	3	3	5	4	3	5	2	3	4	3

## Sheet: SVM 5
Drug name	Grandi Lancaster-Sobie	OHara Lancaster-Sobie	APD90	INa shift	ICaL increase	IKr block	Herg block / Cmax	INa shift +ICaL increase +IKr block	APD90 +INa shift +ICaL increase +IKr block	APD90 +ICaL increase
ajmaline	2	2	2	2	2	2	2	3	2	2
amiodarone	3	3	3	4	4	2	3	4	3	3
amitriptyline	3	3	3	4	4	2	3	4	4	3
azimilide	2	2	2	2	2	5	2	2	2	2
bepridil	4	5	4	5	5	2	2	5	5	5
chlorpromazine	4	5	4	4	4	2	4	4	5	4
cibenzoline	3	3	3	5	4	2	3	4	3	4
cisapride	2	2	2	2	2	2	2	2	2	2
clozapine	2	2	2	2	2	2	2	2	2	2
desipramine	4	4	4	4	4	2	2	4	4	4
diltiazem	4	5	4	5	5	2	5	5	5	5
disopyramide	2	2	2	2	2	2	2	2	2	2
dl-sotalol	4	4	4	5	4	5	2	4	2	4
dofetilide	2	2	2	2	2	2	2	2	2	2
flecainide	2	2	2	2	2	2	2	2	4	2
fluvoxamine	4	4	4	2	4	2	2	5	4	4
halofantrine	4	4	4	5	5	5	4	5	5	4
imipramine	3	3	3	4	4	2	3	4	3	3
loratadine	4	4	4	5	5	2	5	5	3	3
methadone	4	4	4	5	4	2	2	4	4	2
mexiletine	4	4	4	5	4	2	2	5	5	4
mibefradil	4	5	4	4	5	2	5	5	5	5
nifedipine	5	5	5	5	5	5	5	5	5	5
nitrendipine	4	4	4	4	4	2	4	4	4	4
ondansetron	2	2	2	2	2	5	2	2	2	2
pentamidine	4	4	4	4	4	2	4	4	2	2
phenytoin	4	4	4	4	4	2	2	4	4	4
pimozide	4	4	4	5	4	2	2	4	2	2
prenylamine	4	4	4	4	4	5	2	4	4	4
propafenone	3	2	3	2	2	2	2	2	4	3
propranolol	3	3	3	4	4	2	3	4	3	3
quetiapine	4	4	4	5	5	2	3	5	3	3
quinidine	2	2	2	2	2	2	2	3	2	4
ranolazine	2	4	2	4	2	2	2	4	2	2
risperidone	3	3	3	4	4	2	3	4	3	3
sertindole	2	4	4	4	4	2	2	4	2	2
tedisamil	4	4	4	5	5	5	4	5	2	4
terfenadine	2	2	2	2	2	2	2	2	2	2
terodiline	2	2	2	2	2	2	2	2	2	2
thioridazine	5	2	4	2	2	2	2	2	4	4
verapamil	4	2	4	2	4	2	2	2	4	4

[truncated: 19 more sheets: LDA 1 errors, SVM 1 errors, LDA 5 errors, SVM 5 errors, Cqinward LDA 1, Cqinward SVM 1, Cqinward LDA 5, Cqinward SVM 5, Cqinward LDA 1 errors, Cqinward SVM 1 errors, Cqinward LDA 5 errors, Cqinward SVM 5 errors, Epi vs endo O'Hara Lancaster-So, Binary LDA 1, Binary SVM 1, Binary LDA 1 errors, Binary SVM 1 errors, EAD thresholds at faster pacing, Hypokalemia]
